# Supplementary material
Source: publisher figshare collection journal article supplement (https://karger.figshare.com/articles/dataset/_/5126728)
Supplement: Supplementary file 1 [file 1]

## Appendix 1

### Participant testimonials:

| Question/Impression                                                                                                  |                                                                                                                                                                                                                                                                                                                                                                                                                                                                                                                                                                                                                                                                                                                     |                         |                                  |                           |                            |
|----------------------------------------------------------------------------------------------------------------------|---------------------------------------------------------------------------------------------------------------------------------------------------------------------------------------------------------------------------------------------------------------------------------------------------------------------------------------------------------------------------------------------------------------------------------------------------------------------------------------------------------------------------------------------------------------------------------------------------------------------------------------------------------------------------------------------------------------------|-------------------------|----------------------------------|---------------------------|----------------------------|
| Text messaging service is easy to use <sup>a</sup>                                                                   | Very Easy<br>(n=3<br>18.8%)                                                                                                                                                                                                                                                                                                                                                                                                                                                                                                                                                                                                                                                                                         | Easy<br>(n=7<br>43.8%)  | Somewhat Easy<br>(n=3<br>18.8%)  | Neutral<br>(n=2<br>12.5%) | Difficult<br>(n=1<br>6.3%) |
| Easy to find out if drugs are safe to use together using this service <sup>b</sup>                                   | Strongly agree<br>(n=4<br>25%)                                                                                                                                                                                                                                                                                                                                                                                                                                                                                                                                                                                                                                                                                      | Agree<br>(n=6<br>37.5%) | Somewhat Agree<br>(n=4<br>25%)   |                           | Disagree<br>(n=2<br>12.5%) |
| The system would help in avoiding the use of potentially harmful medications with transplant medication <sup>c</sup> | Strongly agree<br>(n=8<br>50%)                                                                                                                                                                                                                                                                                                                                                                                                                                                                                                                                                                                                                                                                                      | Agree<br>(n=5<br>31.3%) | Somewhat Agree<br>(n=2<br>12.5%) |                           | Disagree<br>(n=1<br>6.3%)  |
| Like to use the text messaging system to find out potential drug interactions. <sup>d</sup>                          | Strongly agree<br>(n=7<br>43.8%)                                                                                                                                                                                                                                                                                                                                                                                                                                                                                                                                                                                                                                                                                    | Agree<br>(n=5<br>31.3%) | Somewhat Agree<br>(n=2<br>12.5%) |                           | Disagree<br>(n=2<br>12.5%) |
| How to improve the system <sup>e</sup>                                                                               | <p>“Use (transplant) medication names patients are familiar with, e.g., “Prograf” rather than “Tacrolimus).</p> <p>“Use a letter code for each drug rather than the long drug name”</p> <p>“Instead of the text message “Transplant”, shorten it to “TX” (easier to spell)</p> <p>“find an easier way to spell medication names; concern about copying medication names from pill bottles (small letters and maybe problems spelling)”.</p> <p>“Spelling the medication name is difficult but I think the full name of the medicine needs to be entered to avoid confusion (mistake) with other drugs with similar sounding names”.</p> <p>“Shorten drug names. Have a list of drugs with abbreviations (codes)</p> |                         |                                  |                           |                            |

|  |                                                                                                                                                                                                                                                                                                                                                                                                                                                                                                     |
|--|-----------------------------------------------------------------------------------------------------------------------------------------------------------------------------------------------------------------------------------------------------------------------------------------------------------------------------------------------------------------------------------------------------------------------------------------------------------------------------------------------------|
|  | <p>come up; e.g., ERYTRHOMYCIN=ERY” “Picking from a list rather than typing”. “Drop down menu for patient to select from a list of drugs and press ok”</p> <p>“Put over the counter medicines also in the system. Find a way to (check for interactions), all the drugs patient on with a new drug”</p> <p>“Lot of typing; reduce steps, one text instead of several steps”</p> <p>“Voice prompts-put on speaker” (for people with difficulty typing/reading”. “Letters in the phone too small”</p> |
|--|-----------------------------------------------------------------------------------------------------------------------------------------------------------------------------------------------------------------------------------------------------------------------------------------------------------------------------------------------------------------------------------------------------------------------------------------------------------------------------------------------------|

<sup>a</sup> How easy or difficult did you find the KT-SMS text message service to use?

<sup>b</sup> It is easy to find out if drugs are safe to use together using the KT-SMS/text service

<sup>c</sup> I think the system will help me avoid using medicines that may be harmful to use with my transplant medication.

<sup>d</sup> I like using the cell phone text messaging system to find out whether a medication may react with my transplant medicine; <sup>e</sup> Can you list two things you would like to see changed to make the system better?

Appendix 2: EXIT QUESTIONS/USER  
IMPRESSIONS QUESTIONNAIRE:

1. How easy or difficult did you find the KT-SMS text message service to use?

- ☐ Very difficult
- ☐ Difficult
- ☐ Somewhat difficult
- ☐ Neutral (don't know)
- ☐ Somewhat easy
- ☐ Easy
- ☐ Very easy

How much do you agree or disagree with the following statements?

2. It is easy to find out if drugs are safe to use together using the KT-SMS/text service

- ☐ Strongly disagree
- ☐ Disagree
- ☐ Somewhat disagree
- ☐ Neither agree nor disagree
- ☐ Somewhat agree
- ☐ Agree
- ☐ Strongly agree

3. I think this system will help me avoid using medicines that may be harmful to use with my transplant medication.

- ☐ Strongly disagree
- ☐ Disagree
- ☐ Somewhat disagree
- ☐ Neither agree nor disagree
- ☐ Somewhat agree
- ☐ Agree
- ☐ Strongly agree

4. I like using the cell phone text message system to find out whether a medication may react with my transplant medicine.

- ☐ Strongly disagree
- ☐ Disagree
- ☐ Somewhat disagree
- ☐ Neither agree nor disagree
- ☐ Somewhat agree
- ☐ Agree
- ☐ Strongly agree

5. Can you list two things that you would like to see changed to make the system better?
